# Supplementary material for: Epidemiological Patterns of Seasonal Respiratory Viruses during the COVID-19 Pandemic in Madagascar, March 2020–May 2022
Source: MDPI journal article supplement (doi:10.3390/v15010012), 2022-12-20
Supplement: s1 [file s1]

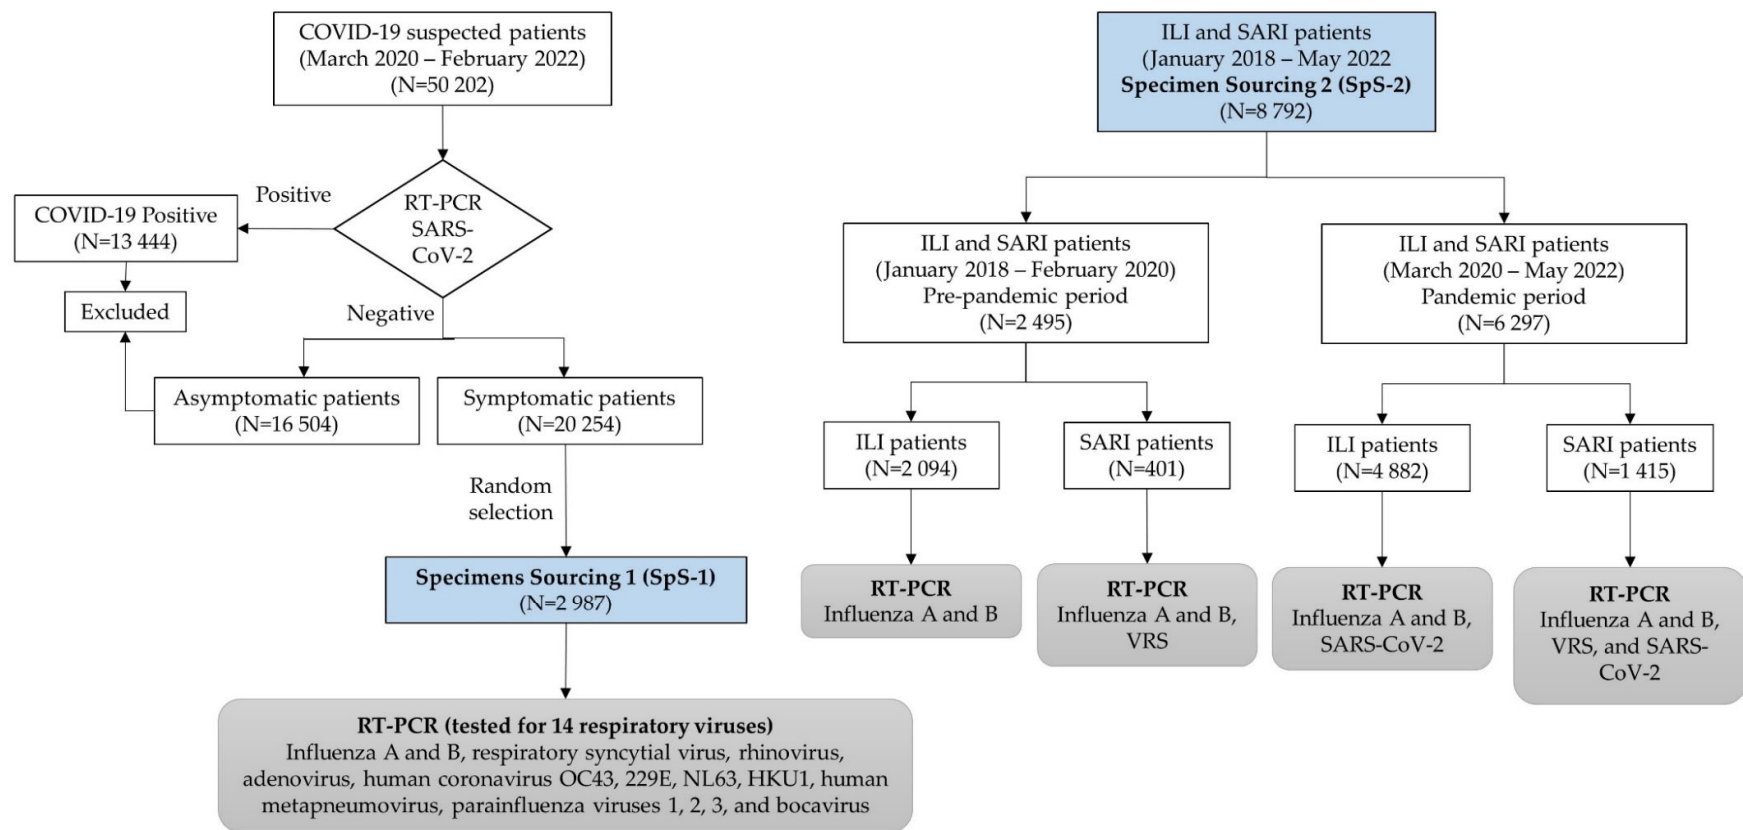

**Figure S1.** Description of the different source of specimens used in the study and tests performed accordingly.

**Table S1.** List of seasonal respiratory virus co-detected in patients during the three epidemic waves of SARS-CoV-2 in Madagascar.

| Wave N° | Co-infections           | N |
|---------|-------------------------|---|
| 1       | HRV + CoV-OC43 + PIV2   | 3 |
|         | HRV + BOV               | 2 |
|         | HRV + CoV-OC43          | 2 |
|         | CoV-OC43 + PIV3         | 2 |
|         | CoV-OC43 + RSV          | 1 |
|         | CoV-OC43 + HMPV         | 1 |
|         | HMPV + CoV-NL63         | 1 |
|         | HMPV + PIV2             | 1 |
|         | PIV3 + CoV-229E         | 1 |
|         | PIV3 + ADV              | 1 |
| 2       | HRV + RSV               | 3 |
|         | HRV + BOV               | 1 |
|         | HRV + CoV-229E          | 1 |
|         | HRV + HMPV              | 1 |
|         | RSV + BOV               | 1 |
|         | RSV + PIV2              | 1 |
|         | RSV + CoV-229E          | 1 |
|         | RSV + ADV               | 1 |
|         | HMPV + CoV-229E         | 1 |
|         | HMPV + BOV              | 1 |
|         | PIV2 + BOV              | 1 |
|         | CoV-OC43 + HMPV + ADV   | 1 |
| 3       | HRV + RSV               | 2 |
|         | HRV + FLU B             | 1 |
|         | HRV + ADV               | 1 |
|         | HRV + BOV               | 1 |
|         | HRV + PIV1              | 1 |
|         | ADV + HMPV              | 1 |
|         | ADV + PIV1              | 1 |
|         | ADV + FLUB              | 1 |
|         | ADV + FLUA              | 1 |
|         | FLUA + CoV-NL63         | 1 |
|         | FLUA + HRV + ADV        | 1 |
|         | FLUA + BOV + ADV        | 1 |
|         | HRV + PIV1 + HMPV + ADV | 1 |

ADV=Adenovirus; BOV=Bocavirus; CoV=Coronavirus; FLU=Influenza; HMPV=Human metapneumovirus; HRV=Human rhinoviruses; PIV=Parainfluenza viruses; RSV=Respiratory syncytial viruses.

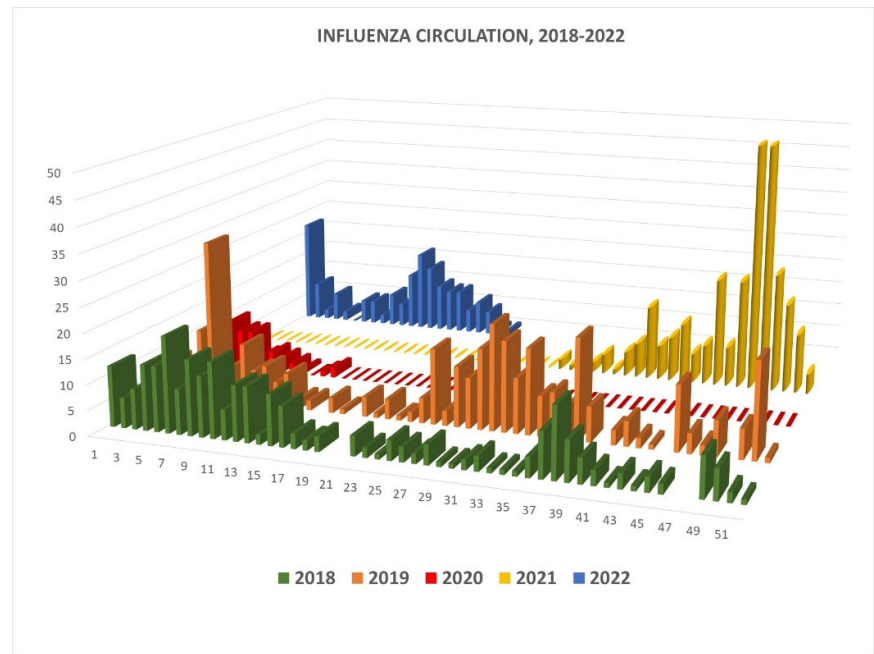

**Figure S2.** Weekly distribution of influenza detected from the influenza-like illnesses (ILI) Surveillance Network, Madagascar, January 2018 to May 2022.

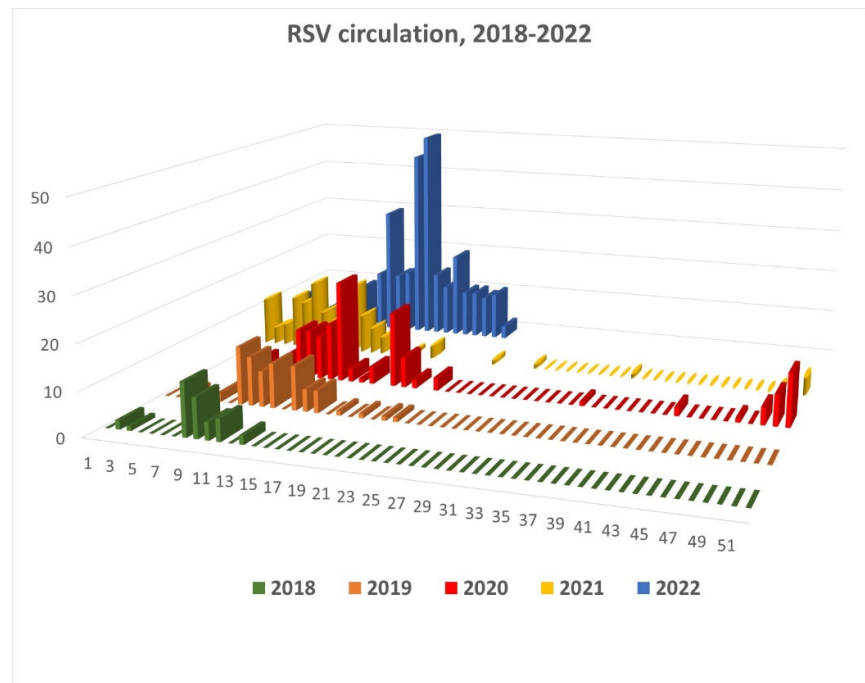

**Figure S3.** Weekly distribution of respiratory syncytial viruses (RSV) detected from severe acute respiratory infections (SARI) surveillance, Madagascar, January 2018 to May 2022.
